# Supplementary material for: Methylone is a rapid-acting neuroplastogen with less off-target activity than MDMA
Source: Front Neurosci. 2024 Feb 7;18:1353131. doi: 10.3389/fnins.2024.1353131 (PMC10882719; doi:10.3389/fnins.2024.1353131)
Supplement: Supplementary file 1 [file Table_1.XLSX]

## Sheet: Sheet1
			Methylone		MDMA
Assay Target	Assay Mode	Conc(uM)	% Agonist Activity	% Antagonist Activity	% Agonist Activity	% Antagonist Activity
ADCYAP1R1	Agonist	1	-4	13.6	-0.3	-0.9
ADCYAP1R1	Agonist	10	-3	12.5	-0.8	-0.1
ADORA3	Agonist	1	-4.5	11.3	0.7	-15.4
ADORA3	Agonist	10	-5.3	7.7	0.6	-11.5
ADRA1B	Agonist	1	-3.3	17.9	-1.6	18.7
ADRA1B	Agonist	10	-2.9	20.6	-1.6	35.1
ADRA2A	Agonist	1	-3.8	-4.6	7	-5
ADRA2A	Agonist	10	-3.8	1.9	6.5	-13.9
ADRA2B	Agonist	1	-1	8.5	5.2	12.8
ADRA2B	Agonist	10	1.3	6.3	1.3	2.9
ADRA2C	Agonist	1	-2.5	-4.3	3.9	16.4
ADRA2C	Agonist	10	0.1	17.6	6.9	38.1
ADRB1	Agonist	1	-1.7	-0.8	0.6	2
ADRB1	Agonist	10	-1.4	-1.2	0.5	1.9
ADRB2	Agonist	1	0	18.1	2	31.9
ADRB2	Agonist	10	-0.2	20.4	1.5	45.7
AGTR1	Agonist	1	-2.8	3.3	3.5	-17.7
AGTR1	Agonist	10	-1	-1.4	3.2	-14.5
AGTRL1	Agonist	1	-0.9	-3.3	-0.8	-13.4
AGTRL1	Agonist	10	-1.5	-4.1	-0.2	-8.4
AVPR1a	Agonist	1	-0.6	-3	-0.2	-3.6
AVPR1a	Agonist	10	-0.5	2.8	-0.4	4.5
AVPR1B	Agonist	1	-1.2	9.8	-1	8.1
AVPR1B	Agonist	10	-1.1	3.5	-1.8	0.8
AVPR2	Agonist	1	-0.9	-2.7	-2.9	-7.8
AVPR2	Agonist	10	1	-14.8	-2.2	-0.4
BDKRB1	Agonist	1	-1.7	2.8	-1.2	-17.1
BDKRB1	Agonist	10	-2.5	12.1	-0.2	-12.7
BDKRB2	Agonist	1	-3.6	7.3	0.3	-6.6
BDKRB2	Agonist	10	-2.9	-2.6	0.1	-5.6
BRS3	Agonist	1	4.5	18.3	2.6	7.9
BRS3	Agonist	10	-4.6	10.1	-3	3.8
C3AR1	Agonist	1	-0.1	2.5	0.2	12.9
C3AR1	Agonist	10	0	0.3	0.2	9.8
C5aR1	Agonist	1	-1	8.9	-1.1	-5.5
C5aR1	Agonist	10	-1.3	5	-1.1	-4.3
C5L2	Agonist	1	8.4	10	7.7	-5.5
C5L2	Agonist	10	12.9	1.4	3.3	-4
CALCR	Agonist	1	-0.3	5.4	-3.5	-8.1
CALCR	Agonist	10	-0.2	-4.4	-2.4	6.8
CALCRL-RAMP1	Agonist	1	-2.6	4.7	0.3	6.8
CALCRL-RAMP1	Agonist	10	-0.2	7	-0.6	8.1
CALCRL-RAMP2	Agonist	1	0.1	19.1	-1	28.7
CALCRL-RAMP2	Agonist	10	2.8	7	0.9	30.8
CALCRL-RAMP3	Agonist	1	-2.2	-18.5	-0.9	-8.1
CALCRL-RAMP3	Agonist	10	-2.2	-7.5	-1.4	-13
CALCR-RAMP2	Agonist	1	0.9	-10.6	-0.3	12.8
CALCR-RAMP2	Agonist	10	1.6	-19.6	2.9	15.7
CALCR-RAMP3	Agonist	1	7.9	-8.9	-18.3	-3.6
CALCR-RAMP3	Agonist	10	7.1	-3.3	-1.4	-1.3
CCKAR	Agonist	1	0.1	-4.3	-0.1	-2.2
CCKAR	Agonist	10	-0.3	-3.3	0.4	0.7
CCKBR	Agonist	1	-1	-1.1	2.3	3.2
CCKBR	Agonist	10	1.5	-2.4	1.2	5.2
CCR1	Agonist	1	-2.6	-8.1	13.6	-13
CCR1	Agonist	10	3.6	-16.6	6.2	-7.6
CCR10	Agonist	1	-2	5.4	-1.1	8.9
CCR10	Agonist	10	-1.8	2.6	-0.7	12.1
CCR2	Agonist	1	-0.4	2	0.5	9.2
CCR2	Agonist	10	-0.5	4.9	0.7	11.1
CCR3	Agonist	1	-6.7	-11.8	-1.5	1.5
CCR3	Agonist	10	-7.6	-4	-1.3	9.6
CCR4	Agonist	1	-0.5	10	0.1	7.7
CCR4	Agonist	10	-1.4	9.5	0.1	13
CCR5	Agonist	1	-0.1	1.7	0.2	4.5
CCR5	Agonist	10	0.3	-0.5	0.1	9.8
CCR6	Agonist	1	-2.9	9.3	1.4	0
CCR6	Agonist	10	-3.3	-1.6	0.7	0.3
CCR7	Agonist	1	-3.4	-8.3	1.9	1.5
CCR7	Agonist	10	-3.7	-3.4	2.6	6.8
CCR8	Agonist	1	-0.2	4.7	-0.2	-3.1
CCR8	Agonist	10	-0.6	-0.3	-0.2	4.3
CCR9	Agonist	1	-0.5	2.9	0.1	5.3
CCR9	Agonist	10	0.2	-9.9	0.2	14.5
CHRM1	Agonist	1	-9.1	15.8	0.2	12.1
CHRM1	Agonist	10	-8.5	2	0.7	0.1
CHRM2	Agonist	1	-0.2	-18.5	0.9	-1
CHRM2	Agonist	10	0.2	-7.4	1.4	10.5
CHRM3	Agonist	1	6	-5.5	5.1	-9.4
CHRM3	Agonist	10	6	14.6	4.3	1.4
CHRM4	Agonist	1	-5.8	10.2	-1.8	32.8
CHRM4	Agonist	10	-6.2	6.7	-3.2	26.3
CHRM5	Agonist	1	7.2	-8	8.8	11.2
CHRM5	Agonist	10	8.7	-7.6	8.3	14.4
CMKLR1	Agonist	1	-0.2	-0.2	-0.3	0.4
CMKLR1	Agonist	10	-0.3	-5.6	-0.4	1.1
CNR1	Agonist	1	-0.4	-3.5	-0.5	7.8
CNR1	Agonist	10	-2.7	-17.1	0.1	11.2
CNR2	Agonist	1	7	3.6	0.1	8.9
CNR2	Agonist	10	3.2	-3.2	-6.8	7.8
CRHR1	Agonist	1	1.4	1.3	0.7	-1.7
CRHR1	Agonist	10	1.1	0.6	0.2	0.2
CRHR2	Agonist	1	0.9	-2	-0.2	4.3
CRHR2	Agonist	10	0.9	-0.3	-0.1	5.7
CRTH2	Agonist	1	-5.7	9	-4.1	19.8
CRTH2	Agonist	10	-5	8.9	-3	17.2
CX3CR1	Agonist	1	0	-0.2	-1.3	6.5
CX3CR1	Agonist	10	-0.4	-6.1	-1.4	3.7
CXCR1	Agonist	1	-0.5	12.1	-0.4	-2.4
CXCR1	Agonist	10	-0.1	3.1	-0.3	-4.6
CXCR2	Agonist	1	-0.2	-7.6	-0.9	12.8
CXCR2	Agonist	10	-2.6	-1	2.2	14.6
CXCR3	Agonist	1	-0.2	4.5	-3.7	11.3
CXCR3	Agonist	10	1.6	-3.9	-4.7	17.9
CXCR4	Agonist	1	-4	10.7	3.1	19.6
CXCR4	Agonist	10	7	-4.2	2.5	14.6
CXCR5	Agonist	1	2.5	-4.3	2.7	-4.4
CXCR5	Agonist	10	1.4	-15.1	1.4	3.2
CXCR6	Agonist	1	0.3	27.2	14.7	20.9
CXCR6	Agonist	10	0.3	12.6	3.8	5.2
CXCR7	Agonist	1	-1.3	14.1	-1.3	5.3
CXCR7	Agonist	10	-0.8	7.3	0.5	8
DRD1	Agonist	1	-1.6	6	-1	-0.5
DRD1	Agonist	10	-1.6	7.8	-0.8	6
DRD2L	Agonist	1	0.1	1.1	3.3	4.8
DRD2L	Agonist	10	-0.7	0.1	2.6	11.7
DRD2S	Agonist	1	0	3.6	1.6	5.8
DRD2S	Agonist	10	0.6	-11.6	1.9	14.7
DRD3	Agonist	1	2.2	-12	7.1	9.6
DRD3	Agonist	10	2.3	-17.8	7.3	10.6
DRD4	Agonist	1	-8	8.4	-0.7	14.9
DRD4	Agonist	10	-9.4	12.2	-0.1	7.7
DRD5	Agonist	1	-0.1	-5.9	1.7	10.8
DRD5	Agonist	10	-0.2	-2.6	1.4	10.5
EBI2	Agonist	1	0.5	0.6	0.6	4.4
EBI2	Agonist	10	-0.1	-2.6	-0.4	7.9
EDG1	Agonist	1	0.1	12.4	0	3.5
EDG1	Agonist	10	0.4	10.5	-0.6	-12.4
EDG3	Agonist	1	-9.4	25.8	-1.7	8.8
EDG3	Agonist	10	-8.6	13.6	-1.1	11
EDG4	Agonist	1	-2.2	-10.2	1.5	7.5
EDG4	Agonist	10	-2.1	-21	2.2	10.2
EDG5	Agonist	1	-4.7	-3.4	-1.1	-0.5
EDG5	Agonist	10	-3.7	-6.3	-1.5	0.6
EDG6	Agonist	1	-1.7	13.2	6.3	14.1
EDG6	Agonist	10	-0.3	7.8	4	18
EDG7	Agonist	1	3	19.5	-2.8	-7
EDG7	Agonist	10	1.1	17.9	-2.4	0.8
EDNRA	Agonist	1	0.3	-2.4	-1.1	2.5
EDNRA	Agonist	10	1.4	-11.3	-1.9	4.6
EDNRB	Agonist	1	0.7	17.5	0	2.5
EDNRB	Agonist	10	-0.1	10.9	-0.3	6.4
F2R	Agonist	1	-2.5	-11.6	-0.7	1.2
F2R	Agonist	10	0.2	-11.4	-1.2	5.9
F2RL1	Agonist	1	-0.6	-26.8	16.4	9.6
F2RL1	Agonist	10	3.8	-16.2	1.8	10.9
F2RL3	Agonist	1	4.3	-11.3	10.8	9.6
F2RL3	Agonist	10	7	-6.9	8.5	13.3
FFAR1	Agonist	1	1.7	-7.9	3.9	-5.6
FFAR1	Agonist	10	4.5	-13.8	7	-0.4
FPR1	Agonist	1	2.2	-4.9	4.4	4.5
FPR1	Agonist	10	0.5	-11.4	3.7	2.5
FPRL1	Agonist	1	-0.5	12.3	-0.1	14.8
FPRL1	Agonist	10	0.1	3.9	-0.1	16.7
FSHR	Agonist	1	-1	-11.8	0.7	3.2
FSHR	Agonist	10	-2.2	-8.4	-0.1	-5.8
GALR1	Agonist	1	0.8	7.1	0.7	-0.2
GALR1	Agonist	10	0.6	6.8	0.6	-5.1
GALR2	Agonist	1	3.4	7	-2.9	-5.1
GALR2	Agonist	10	1.9	1.5	-3	-7.3
GCGR	Agonist	1	-2.3	-16	-1	-1.7
GCGR	Agonist	10	-3	-7.7	-0.9	-7.4
GHSR	Agonist	1	-6.6	25.8	3	-30.8
GHSR	Agonist	10	-7.2	9.1	3.1	-7
GIPR	Agonist	1	-2.9	-1	-2.6	-0.1
GIPR	Agonist	10	-5.8	-5.1	-3.3	-0.1
GLP1R	Agonist	1	-0.3	3.4	-0.4	9.5
GLP1R	Agonist	10	-0.1	-0.9	-0.2	12.9
GLP2R	Agonist	1	-1.5	5.4	0	3.4
GLP2R	Agonist	10	-1	5.4	-5	1.1
GPR1	Agonist	1	-0.5	4.4	0.7	7.6
GPR1	Agonist	10	-0.7	7.4	0.2	11.9
GPR103	Agonist	1	0.8	4.1	-4.2	-15.2
GPR103	Agonist	10	3.1	7	-6.5	-17.1
GPR109A	Agonist	1	-8.7	1.4	-2.1	3.7
GPR109A	Agonist	10	-4.3	-0.3	0.4	1
GPR109B	Agonist	1	1	-16.5	0.7	-15.2
GPR109B	Agonist	10	0.5	-20.2	1.4	-11.4
GPR119	Agonist	1	-5.8	17.1	17.1	2.7
GPR119	Agonist	10	-2.2	-8.8	10.2	3.8
GPR120	Agonist	1	-5.1	46.5	-3.7	11.3
GPR120	Agonist	10	-5.8	40.3	-4.4	8.8
GPR35	Agonist	1	2.2	13.2	0.3	-1.1
GPR35	Agonist	10	2.5	7.3	-1.5	4.6
GPR92	Agonist	1	-1.6	-8	-4	6.8
GPR92	Agonist	10	-3.5	5.8	-2.2	8
GRPR	Agonist	1	0	0.7	-0.3	1.9
GRPR	Agonist	10	-0.1	-1.4	-0.6	1.8
HCRTR1	Agonist	1	-0.1	2.3	-0.2	8.6
HCRTR1	Agonist	10	-0.1	1.2	-0.1	15
HCRTR2	Agonist	1	0.2	6.4	-0.3	5.9
HCRTR2	Agonist	10	0.2	2.4	-0.1	-3.5
HRH1	Agonist	1	3	-18	3.1	13.7
HRH1	Agonist	10	2.5	-2.2	3.8	38.4
HRH2	Agonist	1	-2.5	7.1	3.3	8.4
HRH2	Agonist	10	-2.8	8.1	-3.7	15.3
HRH3	Agonist	1	-3.4	9.5	-3.1	6.2
HRH3	Agonist	10	-3.7	5.8	-2.6	22.6
HRH4	Agonist	1	8.6	-11.6	1.9	14.5
HRH4	Agonist	10	9	-14	3.1	14.5
HTR1A	Agonist	1	0.8	-5.2	1.1	-5.1
HTR1A	Agonist	10	-0.1	-6.4	2.4	-0.9
HTR1B	Agonist	1	3.3	-9.5	8.5	-7.3
HTR1B	Agonist	10	6.7	-6.2	10.4	-0.1
HTR1E	Agonist	1	-3.5	7.6	1.9	18
HTR1E	Agonist	10	0.2	13.2	1.1	12.7
HTR1F	Agonist	1	-4.4	14.4	10.9	14.6
HTR1F	Agonist	10	-3	9.2	8.5	10.8
HTR2A	Agonist	1	-0.1	-7.9	4.9	5.1
HTR2A	Agonist	10	1.4	-2.7	27.5	3
HTR2C	Agonist	1	1.4	21.1	15.9	22.5
HTR2C	Agonist	10	3.7	24.2	28	52.2
HTR5A	Agonist	1	13.6	9.8	7.2	-16.4
HTR5A	Agonist	10	13.9	1.6	0.8	-6.4
KISS1R	Agonist	1	-5.5	28.7	-4.8	-13.9
KISS1R	Agonist	10	-3.7	14.5	-4.3	1.8
LHCGR	Agonist	1	0.4	13.8	2.4	1.2
LHCGR	Agonist	10	0.4	11.2	0.9	-1
LTB4R	Agonist	1	-0.3	3.5	0.5	8.9
LTB4R	Agonist	10	-0.8	-5.2	0.5	11.3
MC1R	Agonist	1	-2.6	20.1	-6.6	6.5
MC1R	Agonist	10	-4.4	15.9	-3.4	-4.9
MC3R	Agonist	1	-3.2	-5.7	0.7	5.9
MC3R	Agonist	10	-1.8	0.3	1.3	1.9
MC4R	Agonist	1	-1.4	-5.2	2.3	-14.5
MC4R	Agonist	10	-1.1	-14	0.7	-11.7
MC5R	Agonist	1	-7.9	1.7	2.5	-0.9
MC5R	Agonist	10	-8.9	-6.3	1	7.1
MCHR1	Agonist	1	3.9	-12.2	-4	5.3
MCHR1	Agonist	10	3.1	-18.3	-4.4	2.1
MCHR2	Agonist	1	-1.5	2	0.8	-25
MCHR2	Agonist	10	-0.7	-4.5	0.3	-17.3
MLNR	Agonist	1	-1.5	15.6	-0.3	6.2
MLNR	Agonist	10	-1	12.3	-0.1	16.3
MRGPRX1	Agonist	1	-1.7	-6.5	0.2	5.1
MRGPRX1	Agonist	10	-1.5	-10.2	-0.4	7.6
MRGPRX2	Agonist	1	1.4	16.2	-0.8	-6
MRGPRX2	Agonist	10	0.7	8.9	-0.8	1.9
MTNR1A	Agonist	1	-12.3	30.8	-9.2	18.4
MTNR1A	Agonist	10	-11.7	7.8	-9.6	17.7
NMBR	Agonist	1	1.1	10.3	0	-2.5
NMBR	Agonist	10	1.2	13.2	0.1	4.3
NMU1R	Agonist	1	1.3	-6.7	0	-3.7
NMU1R	Agonist	10	2	-9.3	-0.1	6.8
NPBWR1	Agonist	1	1.6	17.1	-10.2	-7.5
NPBWR1	Agonist	10	-1.9	25.1	-13.4	-8.5
NPBWR2	Agonist	1	-0.3	-14.1	-2.6	-2.1
NPBWR2	Agonist	10	1.3	-14	-2.3	2.4
NPFFR1	Agonist	1	-4.6	32	-3.2	17.7
NPFFR1	Agonist	10	-5.6	27.1	-5.5	20.8
NPSR1B	Agonist	1	-1.3	-10.6	-3.8	4.3
NPSR1B	Agonist	10	4.8	-7.6	-5.1	5
NPY1R	Agonist	1	-2.2	0.2	1.3	-3.9
NPY1R	Agonist	10	-4.9	5.4	0.6	2.2
NPY2R	Agonist	1	-0.1	2.3	-0.1	12
NPY2R	Agonist	10	0.2	2	0.2	4.8
NTSR1	Agonist	1	-4.7	-0.7	-0.8	8.7
NTSR1	Agonist	10	-3.5	-1.7	1.2	0.5
OPRD1	Agonist	1	-2	-2.7	-0.7	-15.5
OPRD1	Agonist	10	-1.5	3.5	-1.1	-17.6
OPRK1	Agonist	1	-6.3	11.8	1.7	16.7
OPRK1	Agonist	10	-4.1	10.4	0.5	18.1
OPRL1	Agonist	1	-1.6	17.1	0.5	-6.7
OPRL1	Agonist	10	-2.3	13.2	-0.4	-3.2
OPRM1	Agonist	1	0.2	-8	-0.4	-22.1
OPRM1	Agonist	10	0.5	-18	-0.2	-18.9
OXER1	Agonist	1	3.2	2.9	6.3	-7.5
OXER1	Agonist	10	-3.7	7.6	4.8	-1.7
OXTR	Agonist	1	-0.6	12.7	-0.2	3.7
OXTR	Agonist	10	-0.5	6.9	0.6	8.2
P2RY1	Agonist	1	2.2	14.5	0.3	2.8
P2RY1	Agonist	10	-4.1	14.9	-0.8	1.2
P2RY11	Agonist	1	0.5	2.7	0.3	17.9
P2RY11	Agonist	10	-0.3	6.6	0.7	9
P2RY12	Agonist	1	-1.5	-14.8	-1.6	8.6
P2RY12	Agonist	10	-2.5	-10.4	-0.6	5.9
P2RY2	Agonist	1	-2.1	5.4	6.6	11.5
P2RY2	Agonist	10	-2.7	1.8	7.8	9.6
P2RY4	Agonist	1	-3.3	15.1	-4.2	5.7
P2RY4	Agonist	10	-4.1	17.5	-7.2	-0.6
P2RY6	Agonist	1	4.5	6.5	4.9	2.5
P2RY6	Agonist	10	2.4	2.6	4.6	1.2
PPYR1	Agonist	1	-1.7	9.5	0.3	5.9
PPYR1	Agonist	10	-1.2	6.5	0.9	6.9
PRLHR	Agonist	1	-2.2	17.8	1.5	6
PRLHR	Agonist	10	-0.2	15.8	-0.3	10.8
PROKR1	Agonist	1	-1.3	8.7	0.3	-8.7
PROKR1	Agonist	10	-2.8	3.3	0.7	8.5
PROKR2	Agonist	1	-0.6	2	-0.6	14.4
PROKR2	Agonist	10	-0.6	-6.8	-0.3	19.4
PTAFR	Agonist	1	-1.3	2	0.6	11.4
PTAFR	Agonist	10	-2.6	-6.7	0.4	12.1
PTGER2	Agonist	1	-1.4	12.7	0.7	-9.8
PTGER2	Agonist	10	-3.1	-4.4	1.1	-12.8
PTGER3	Agonist	1	4.5	-6.2	3.5	5.2
PTGER3	Agonist	10	1.9	-5.7	3.6	4.2
PTGER4	Agonist	1	-2.8	10.1	11.1	7.2
PTGER4	Agonist	10	-1.4	4.3	7.8	11.7
PTGFR	Agonist	1	0.3	0.9	-1.5	-1.5
PTGFR	Agonist	10	-0.2	0	-0.4	7.8
PTGIR	Agonist	1	-4.4	12.4	2.3	18.8
PTGIR	Agonist	10	-2.3	-21.5	8.6	22.7
PTHR1	Agonist	1	0	2.2	0	-2.1
PTHR1	Agonist	10	0.1	-8.3	0.1	7.7
PTHR2	Agonist	1	-0.6	-1	0.2	2.9
PTHR2	Agonist	10	-0.5	-0.2	0.5	7
RXFP3	Agonist	1	-7.6	23.1	-5.2	15.3
RXFP3	Agonist	10	-8.7	32.6	-0.7	19.1
SCTR	Agonist	1	-2.6	5.3	0.1	-3.8
SCTR	Agonist	10	-1.4	2.5	-1.9	7.4
SSTR1	Agonist	1	-5.3	32.4	-9	5.6
SSTR1	Agonist	10	-7.4	20.9	-12.3	7.5
SSTR2	Agonist	1	0	-0.4	0	2.7
SSTR2	Agonist	10	0.7	-4.2	0.2	9.1
SSTR3	Agonist	1	0.7	13.2	2.9	3.7
SSTR3	Agonist	10	0.3	8	0.1	-0.9
SSTR5	Agonist	1	-2.4	14.7	-2.5	1.6
SSTR5	Agonist	10	-1.3	5.7	-3.2	-2
TACR1	Agonist	1	-3.9	15.2	-0.2	4.4
TACR1	Agonist	10	-4.4	8.9	-0.1	-2.1
TACR2	Agonist	1	-1.9	10	0.1	12.5
TACR2	Agonist	10	-3.3	9.1	-0.1	10.7
TACR3	Agonist	1	0.8	-3.9	0.1	14.6
TACR3	Agonist	10	1.1	-14.3	1	19.1
TBXA2R	Agonist	1	-1.1	-5.5	2.8	9.4
TBXA2R	Agonist	10	-2.9	-19.7	1.6	14.2
TRHR	Agonist	1	-2	-7.2	-0.4	16.2
TRHR	Agonist	10	-2.2	2.8	-0.1	9.9
TSHR(L)	Agonist	1	-1.2	6.1	-0.6	-8
TSHR(L)	Agonist	10	0.7	-6.6	2.8	-5
UTR2	Agonist	1	0.6	-2.1	-1.1	4.4
UTR2	Agonist	10	0	4.2	-0.1	14.3
VIPR1	Agonist	1	0.3	-0.7	-0.8	5.7
VIPR1	Agonist	10	0.6	5.3	-0.6	5.1
VIPR2	Agonist	1	-0.4	-1.5	-1.6	-1.1
VIPR2	Agonist	10	-0.3	-2.6	-0.7	3.1
